# Supplementary material for: Factors associated with recruitment to randomised controlled trials in general practice: protocol for a systematic review
Source: Springer Nature journal article supplement (doi:10.1186/s13063-019-3354-z), 2019-05-10
Supplement: MOESM2 [file 16715724]

**Source: Ovid MEDLINE(R) In-Process & Other Non-Indexed Citations and Ovid MEDLINE**

Interface: OvidSP

Database coverage dates: 1946 to Present

Search date: 23 May 2018

Retrieved records: 2565

Search strategy:

- 1 exp Clinical Trials as Topic/ (314264)
- 2 Multicenter Studies as Topic/ (16891)
- 3 ((clinical or controlled or multicenter or multicentre or multi-center or multi-centre) adj2 (trial? or study or studies or research)).tw. (767858)
- 4 or/1-3 (955516)
- 5 Patient Selection/ (59037)
- 6 Patient Participation/ (22511)
- 7 Personnel Selection/ (12194)
- 8 (participat\* or recruit\* or enrol\*).tw. (968575)
- 9 or/5-8 (1043466)
- 10 exp Informed Consent/ (38811)
- 11 (informed adj (consent or decision\* or choice\*)).tw. (38569)
- 12 or/10-11 (67122)
- 13 9 or 12 (1096693)
- 14 exp General Practice/ (71870)
- 15 General Practitioners/ (6148)
- 16 Physicians, Family/ (15790)
- 17 (family adj (practitioner? or practice? or doctor? or physician?)).tw. (24864)
- 18 (general adj (practitioner? or practice?)).tw. (72546)
- 19 or/14-18 (136820)
- 20 4 and 13 and 19 (2565)

**Source: Embase 1947-Present, updated daily**

Interface: OvidSP

Database coverage dates: 1947 to present

Search date: 23 May 2018

Retrieved records: 3545

Search strategy:

- 1 exp "clinical trial (topic)"/ (268156)
- 2 ((clinical or controlled or multicenter or multicentre or multi-center or multi-centre) adj2 (trial? or study or studies or research)).tw. (1110689)
- 3 or/1-2 (1236479)
- 4 patient selection/ (84060)
- 5 patient participation/ (23530)
- 6 personnel management/ (55756)
- 7 (participat\* or recruit\* or enrol\*).tw. (1461388)
- 8 or/4-7 (1601441)
- 9 informed consent/ (93436)
- 10 (informed adj (consent or decision\* or choice\*)).tw. (74374)
- 11 or/9-10 (120989)
- 12 8 or 11 (1692683)

- 13 general practice/ (80065)
- 14 general practitioner/ (89915)
- 15 (family adj (practitioner? or practice? or doctor? or physician?)).tw. (31843)
- 16 (general adj (practitioner? or practice?)).tw. (96029)
- 17 or/13-16 (199931)
- 18 3 and 12 and 17 (3545)

**Source: Cochrane Central Register of Controlled Trials (CENTRAL): Issue 4 of 12, April 2018 & Cochrane Database of Systematic Reviews (CDSR): Issue 5 of 12, May 2018**

Interface: Cochrane Library/Wiley Interscience

Database coverage dates: Not available

Search date: 23 May 2018

Retrieved records: CENTRAL subset = 553 & CDSR subset = 15

Search strategy:

- #1 MeSH descriptor: [Clinical Trials as Topic] explode all trees 57992
- #2 MeSH descriptor: [Multicenter Studies as Topic] this term only 2039
- #3 ((clinical or controlled or multicenter or multicentre or multi-center or multi-centre) near/2 (trial? or study or studies or research)):ti,ab 164485
- #4 #1 or #2 or #3 209112
- #5 MeSH descriptor: [Patient Selection] this term only 3646
- #6 MeSH descriptor: [Patient Participation] this term only 1228
- #7 MeSH descriptor: [Personnel Selection] this term only 54
- #8 (participat\* or recruit\* or enrol\*):ti,ab 175407
- #9 #5 or #6 or #7 or #8 178120
- #10 MeSH descriptor: [Informed Consent] explode all trees 672
- #11 (informed next (consent or decision\* or choice\*)):ti,ab 8638
- #12 #10 or #11 8965
- #13 #9 or #12 182907
- #14 MeSH descriptor: [General Practice] explode all trees 2636
- #15 MeSH descriptor: [General Practitioners] this term only 220
- #16 MeSH descriptor: [Physicians, Family] this term only 488
- #17 (family next (practitioner? or practice? or doctor? or physician?)):ti,ab 839
- #18 (general next (practitioner? or practice?)):ti,ab 4072
- #19 #14 or #15 or #16 or #17 or #18 6628
- #20 #4 and #13 and #19 595

**Source: OpenGrey**

Interface: <http://www.opengrey.eu/>

Database coverage dates: Not available

Search date: 1 June 2018

Retrieved records: 230 (filtered to English language)

Search strategy:

((family NEAR/1 (practitioner\* or practice\* or doctor\* or physician\*) OR (general NEAR/1 (practitioner\* or practice\*)))

**Source: National Technical Reports Library (NTIS)**

Interface: <https://ntrl.ntis.gov/NTRL/>  
Database coverage dates: Not available  
Search date: 1 June 2018  
Retrieved records: 65  
Search strategy:

((("family practitioner" or "family doctor" or "family physician" or "family practice" or "general practitioner" or "general practice") and (rct or "clinical trial" or "controlled trial" or "multicenter study" or "multi-center study")) and (participat\* or recruit\* or enrol\* or "informed consent" or "informed decision" or "informed choice"))
